# Supplementary material for: Exocrine tissue-driven TFF2 prevents apoptotic cell death of endocrine lineage during pancreas organogenesis
Source: PubMed Central journal article supplement (PMC6367380; doi:10.1038/s41598-018-38062-9), 2019-02-07
Supplement: 41598_2018_38062_MOESM1_ESM.pdf [file 41598_2018_38062_MOESM1_ESM.pdf]

## Supplementary Information

Exocrine tissue-driven TFF2 prevents  
apoptotic cell death of endocrine lineage  
during pancreas organogenesis

Koji Hirata, Sota Kodama, Yasuhiro Nakano,  
Yasuko Minaki-Nakagawa, Yoshiki Aoyama,  
Morito Sakikubo, Toshihiko Goto, Masahiro  
Yoshida, Toshihiko Masui, Takuya Yamamoto,  
Shinji Uemoto and Yoshiya Kawaguchi

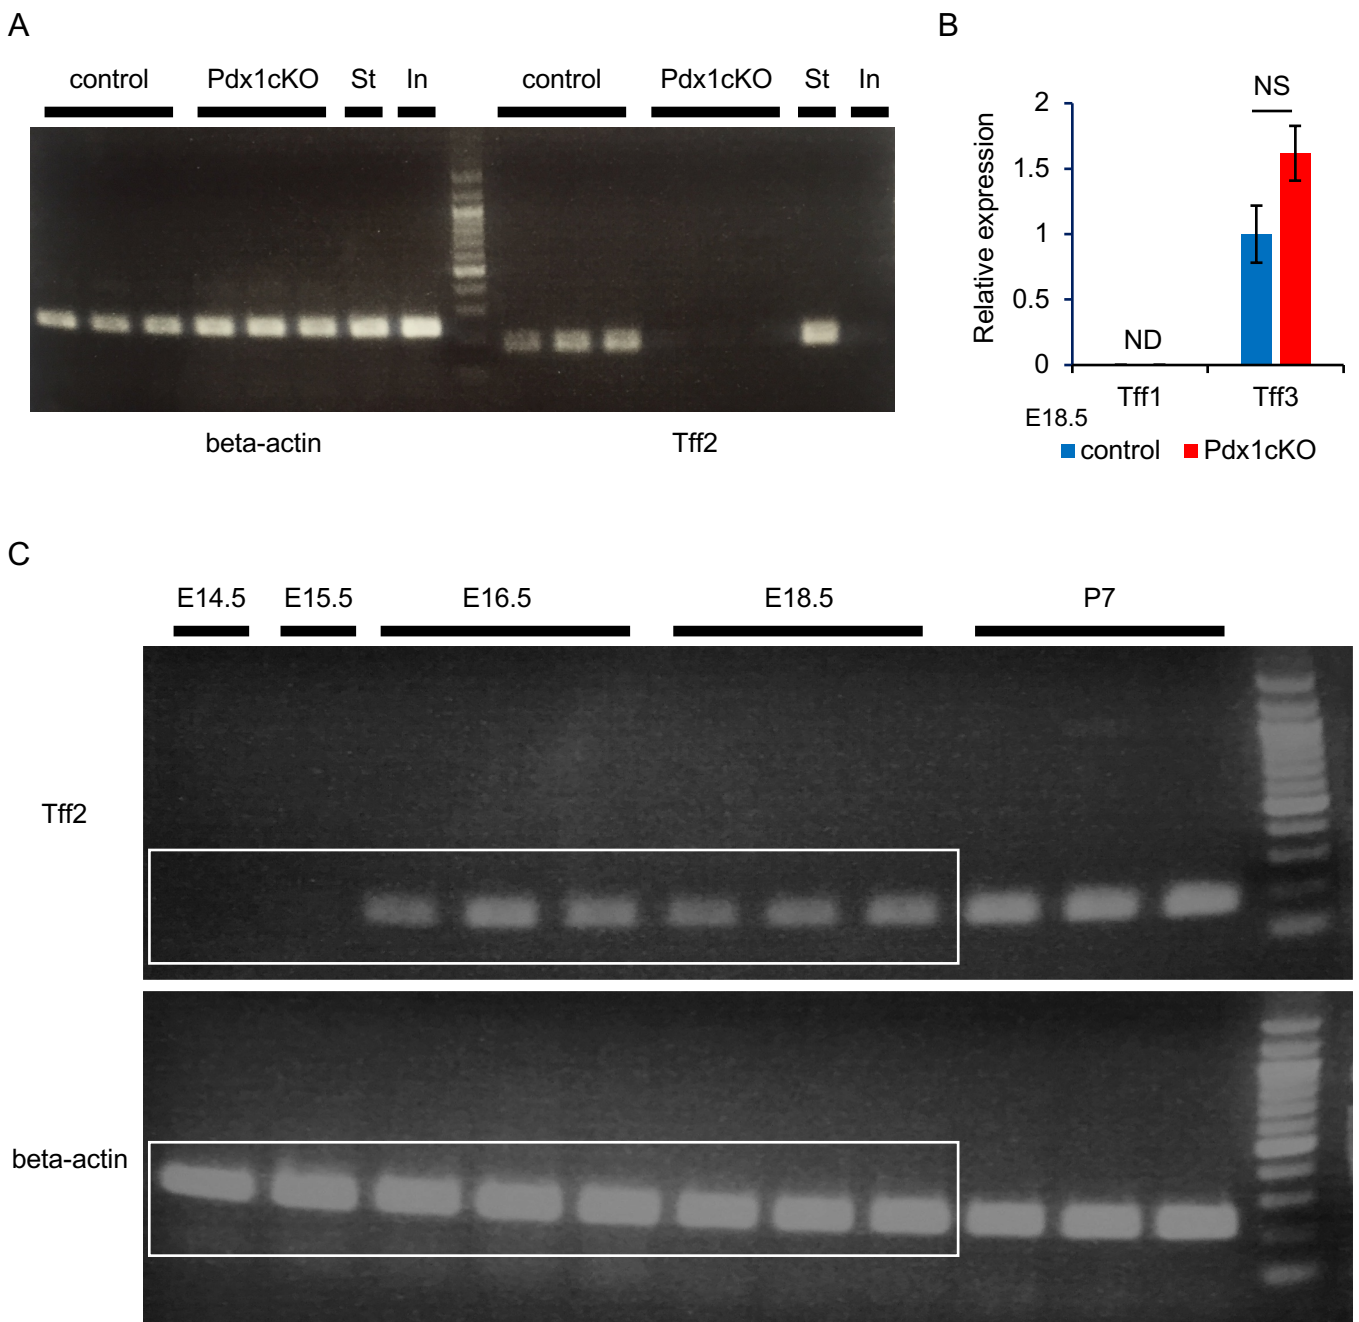

**Supplementary Figure S1. The expression of *TFF* family in mice pancreas by RT-PCR.**

(A) The expression of *TFF2* mRNA detected by RT-PCR at P1 in control and Pdx1cKO mouse pancreata. St: stomach of WT mice (positive control), In: small intestine of WT mice (negative control). (B) The relative expressions of *TFF1* and *TFF3* mRNA at P1 in both pancreata. (C) Original RT-PCR data of Figure 1A. Approximate regions used for figures are marked with rectangles. The ladder shows markers every 100 bp. The bottom band is 100 bp. Bars represent the mean  $\pm$  SE.

A

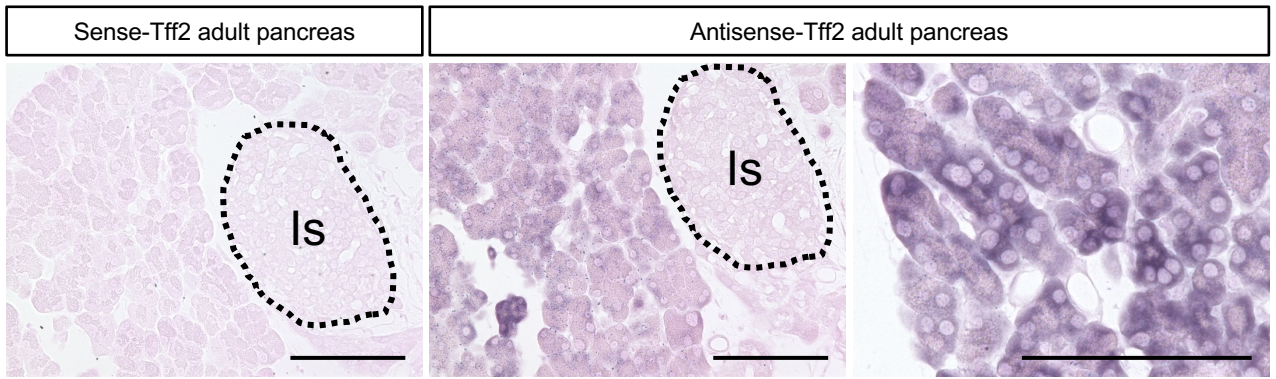

B

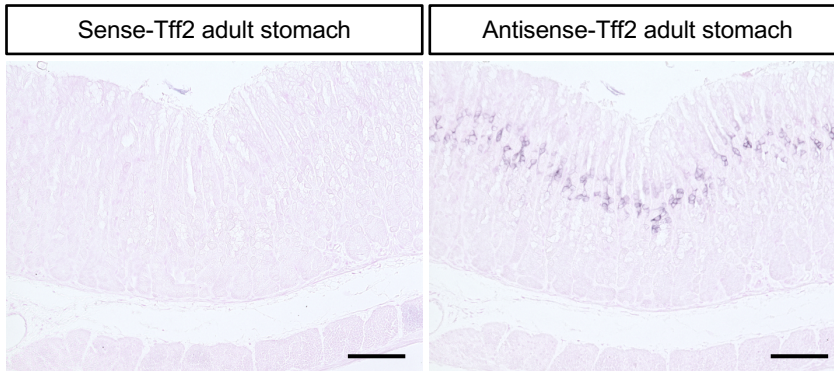

**Supplementary Figure S2. Localization of *TFF2* mRNA in control adult mice.**

The localization of endogenous *TFF2* by in situ hybridization on sections of pancreas and stomach in control mice. (A) *TFF2* mRNA is detected in acinar of adult mice pancreas (middle and right panel) by an anti-sense probe. *TFF2* mRNA expression is hardly observed in adult mice islet. Left panel shows negative control with a sense probe. Is: Islet. (B) *TFF2* mRNA was detected in mucous neck cells of adult mice stomach (right panel). Left panel shows negative control with a sense probe. Scale bars, 100  $\mu$ m.

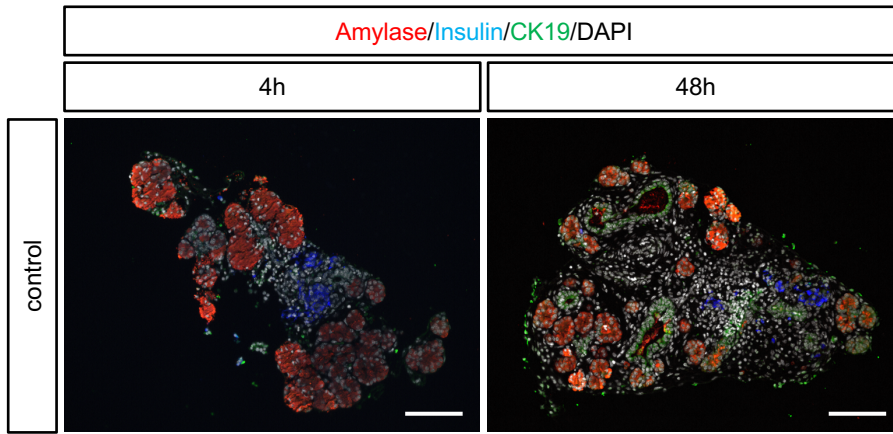

**Supplementary Figure S3. Explant culture with conditioned medium in E16.5 control mice.**

Immunostaining of amylase (red), insulin (blue), CK19 (green) and DAPI (white) in control mice pancreatic explant at 4 hours after (left panel) and 48 hours after (right panel). Pancreatic explant shows similar compositions at 4 hours and 48 hours. The percentage of pHH3 positive cells among insulin-expressing cells tended to decrease on cultured explant at 48 hours compared with in vivo pancreas at E16.5. Scale bars, 100  $\mu$ m.

| <b>Transcripts Cluster ID</b> | <b>Fold Change</b> | <b>Regulation</b> | <b>genesymbol</b> | <b>genedescription</b>                                      |
|-------------------------------|--------------------|-------------------|-------------------|-------------------------------------------------------------|
| 10581355                      | 48.523033          | down              | Ctrl              | chymotrypsin-like                                           |
| 10464328                      | 42.33804           | down              | Pnliprp2          | pancreatic lipase-related protein 2                         |
| 10551531                      | 33.378933          | down              | Sycn              | syncollin                                                   |
| 10432652                      | 24.593367          | down              | Cela1             | chymotrypsin-like elastase family, member 1                 |
| 10498741                      | 24.02757           | down              | Serpini2          | serine (or cysteine) peptidase inhibitor, clade I, member 2 |
| <b>10449661</b>               | <b>21.991234</b>   | <b>down</b>       | <b>Tff2</b>       | <b>trefoil factor 2 (spasmolytic protein 1)</b>             |
| 10568165                      | 18.505526          | down              | Zg16              | zymogen granule protein 16                                  |
| 10558159                      | 18.343609          | down              | Dmbt1             | deleted in malignant brain tumors 1                         |
| 10458704                      | 11.441293          | down              | Spink3            | serine peptidase inhibitor, Kazal type 3                    |
| 10544338                      | 11.2995825         | down              | Prss3             | protease, serine, 3                                         |
| 10539795                      | 10.904543          | down              | Gkn2              | gastrokine 2                                                |
| 10466027                      | 10.085808          | down              | Pga5              | pepsinogen 5, group I                                       |
| 10390850                      | 9.687266           | down              | Krt20             | keratin 20                                                  |

**Supplementary Table S1. Secreted factors and acinar-associated genes downregulated by Pdx1 inactivation.**

**Supplementary Table S2. Primary Antibodies**

| Antigen      | Species    | Dilution | Supplier (Cat.#)                                 |
|--------------|------------|----------|--------------------------------------------------|
| TFF2         | Rabbit     | 1:50     | Proteintech, Rosemont, IL, USA (13681-1-AP)      |
| CXCR4        | Goat       | 1:300    | Capralogics Inc., Hardwick, MA, USA (CI0116)     |
| Insulin      | Guinea Pig | 1:400    | Dako, Glostrup, DNK (A0564)                      |
| Nkx6.1       | Mouse      | 1:300    | DSHB, Iowa, IA, USA (F55A12)                     |
| beta-catenin | Mouse      | 1:300    | BD Biosciences, Franklin Lakes, NJ, USA (610154) |
| Amylase      | Rabbit     | 1:1000   | Sigma, Tokyo, JPN (A8273)                        |
| CK19         | Goat       | 1:100    | Santa Cruz, Dallas, TX, USA (sc-33111)           |
| PHH3         | Rabbit     | 1:1000   | Millipore, Burlington, MA, USA (04-1093)         |

**Supplementary Table S3. Secondary Antibodies**

| Conjugate       | Antigen        | Species | Dilution | Supplier (Cat.#)                     |
|-----------------|----------------|---------|----------|--------------------------------------|
| Alexa Fluor 488 | Rabbit IgG     | Donkey  | 1:1000   | Molecular Probes, California, USA    |
| Alexa Fluor 488 | Mouse IgG      | Donkey  | 1:1000   | Molecular Probes, California, USA    |
| Alexa Fluor 488 | Goat IgG       | Donkey  | 1:1000   | Molecular Probes, California, USA    |
| Cy3             | Guinea Pig IgG | Donkey  | 1:400    | Chemicon, Massachusetts, USA         |
| Cy3             | Rabbit IgG     | Donkey  | 1:400    | Chemicon, Massachusetts, USA         |
| Cy3             | Mouse IgG      | Donkey  | 1:400    | Chemicon, Massachusetts, USA         |
| Cy5             | Guinea Pig IgG | Donkey  | 1:400    | Chemicon, Massachusetts, USA         |
| HRP(ImmuPress)  | Rabbit IgG     | Horse   | 1:1      | Vector Laboratories, California, USA |

**Supplementary Table S4. RT-PCR primer sets**

| Gene       |         | Sequence                       |
|------------|---------|--------------------------------|
| GapDH      | Forward | 5'-GTGTTCCCTACCCCAATGTGT-3'    |
|            | Reverse | 5'-ATTGTCATACCAGGAAATGAGCTT-3' |
| beta-actin | Forward | 5'-AGCCATGTACGTAGCCATCC-3'     |
|            | Reverse | 5'-CTCTCAGCTGTGGTGGTGAA-3'     |
| Tff1       | Forward | 5'-ATCTGTGTCCTCGCTGTGGT-3'     |
|            | Reverse | 5'-CCGGACACTGTCATCAAAC-3'      |
| Tff2       | Forward | 5'-TGCTTTGATCTTGGATGCTG-3'     |
|            | Reverse | 5'-GGAAAAGCAGCAGTTTCGAC-3'     |
| Tff3       | Forward | 5'-CTGGTTGCTGGGTCCTCTG-3'      |
|            | Reverse | 5'-GGGCACATTTGGGATACTGG-3'     |
